# Supplementary material for: The usability of ventilators: a comparative evaluation of use safety and user experience
Source: Springer Nature journal article supplement (doi:10.1186/s13054-016-1431-1), 2016-08-18
Supplement: MOESM2 [file 10602384]

## Ventilator Comparison Evaluation

\* 1. First Name

\* 2. Last Name

\* 3. Email address

\* 4. Phone number

We recommend entering your mobile number.

\* 5. How long have you been a Registered Respiratory Therapist?

- Less than 5 years
- 5-15 years
- 15 or more years

6. In what age range do you belong?

- <25 years
- 25-34 years
- 35-44 years
- 45-54 years
- 55-64 years
- >65 years

7. In which hospital(s) do you currently work?

\* 8. Which patient population do you currently work with primarily?

- Adult
- Pediatric
- Neonatal

Other (please specify)

\* 9. In which unit(s) of the hospital do you primarily work in?

- In-patient unit
- Emergency
- Intensive care unit

Other (please specify)

\* 10. Within the last month, how often have you set up a ventilator and/or adjusted ventilator settings to assist with patient breathing?

- Never
- Once
- At least once a week
- Several times a week
- Every day
- Other (please specify)

\* 11. Have you ever had a consulting relationship with a company that develops or sells ventilators?

- Yes
- No

If yes, please provide details:

## Ventilator Comparison Evaluation

The Puritan Bennett 840 and Puritan Bennett 980 are pictured below.

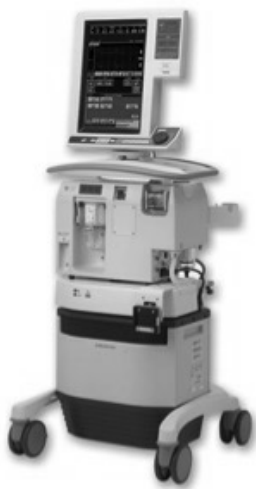

Puritan Bennett 840

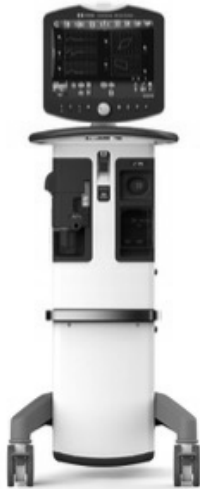

Puritan Bennett 980

The Hamilton S1 and Hamilton G5 are pictured below.

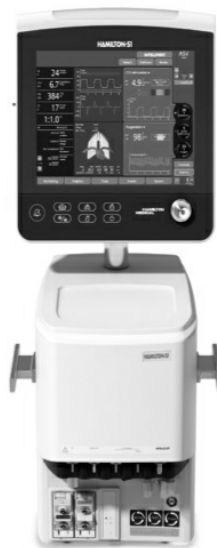

Hamilton S1

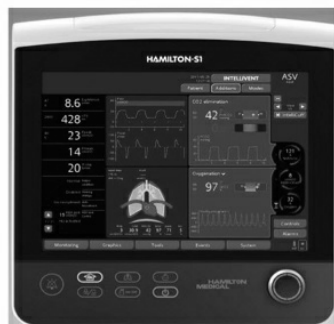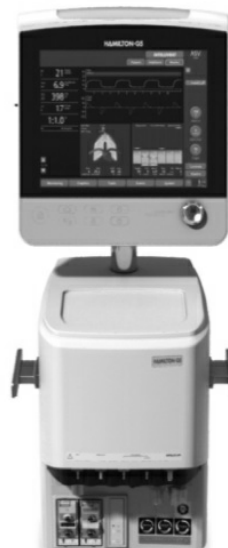

Hamilton G5

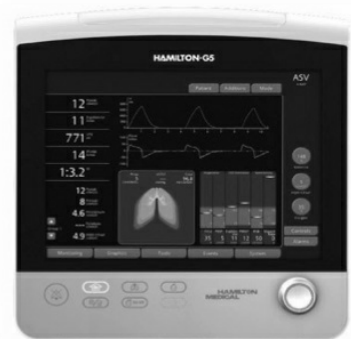

The Dräger Evita XL, Dräger Evita Infinity V500 and Dräger Savina 300 are pictured below.

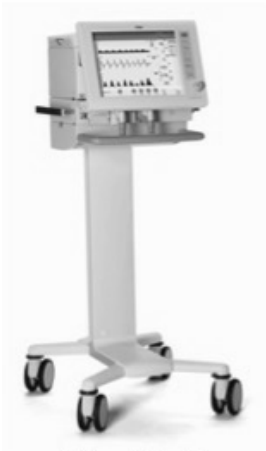

Dräger Evita XL

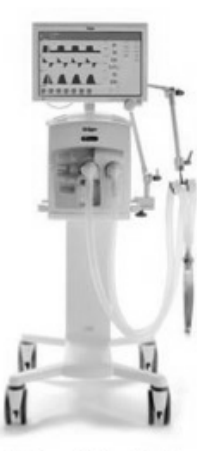

Dräger Evita V500

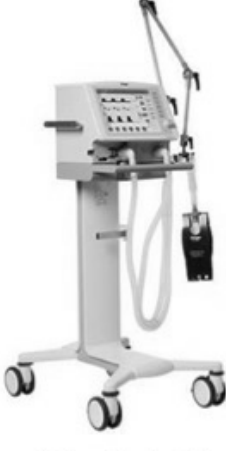

Dräger Savina 300

The Maquet SERVO-i and Maquet SERVO-u is pictured below.

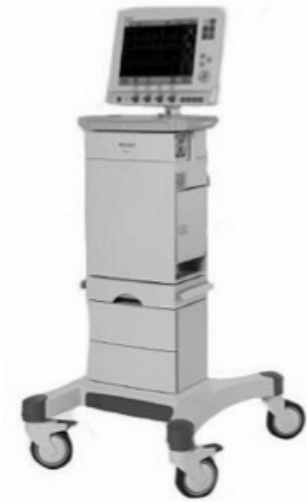

Maquet SERVO-i

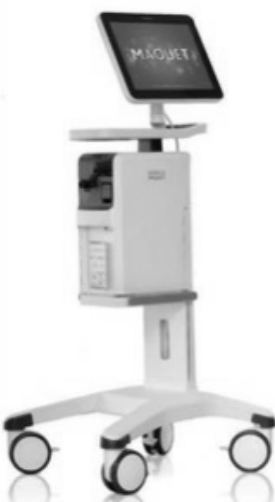

Maquet SERVO-u

\* 12. How many years of experience do you have with the following devices (images pictured above)?

*Example responses: n/a, <1, 2, etc.*

|                      |                      |
|----------------------|----------------------|
| Puritan Bennett 840: | <input type="text"/> |
| Puritan Bennett 980: | <input type="text"/> |
| Hamilton S1:         | <input type="text"/> |
| Hamilton G5:         | <input type="text"/> |
| Dräger Evita XL:     | <input type="text"/> |
| Dräger Evita V500:   | <input type="text"/> |
| Dräger Savina 300:   | <input type="text"/> |
| Maquet SERVO-i:      | <input type="text"/> |
| Maquet SERVO-u:      | <input type="text"/> |

\* 13. When was the last time you used the following devices in your practice?

|                      | No Experience         | Currently using it    | 1-3 months ago        | 4-6 months ago        | 7-12 months ago       | 1-5 years ago         | 5-10 years ago        | 10+ years ago         |
|----------------------|-----------------------|-----------------------|-----------------------|-----------------------|-----------------------|-----------------------|-----------------------|-----------------------|
| Puritan Bennett 840: | <input type="radio"/> | <input type="radio"/> | <input type="radio"/> | <input type="radio"/> | <input type="radio"/> | <input type="radio"/> | <input type="radio"/> | <input type="radio"/> |
| Puritan Bennett 980: | <input type="radio"/> | <input type="radio"/> | <input type="radio"/> | <input type="radio"/> | <input type="radio"/> | <input type="radio"/> | <input type="radio"/> | <input type="radio"/> |
| Hamilton S1:         | <input type="radio"/> | <input type="radio"/> | <input type="radio"/> | <input type="radio"/> | <input type="radio"/> | <input type="radio"/> | <input type="radio"/> | <input type="radio"/> |
| Hamilton G5:         | <input type="radio"/> | <input type="radio"/> | <input type="radio"/> | <input type="radio"/> | <input type="radio"/> | <input type="radio"/> | <input type="radio"/> | <input type="radio"/> |
| Dräger Evita XL:     | <input type="radio"/> | <input type="radio"/> | <input type="radio"/> | <input type="radio"/> | <input type="radio"/> | <input type="radio"/> | <input type="radio"/> | <input type="radio"/> |
| Dräger Evita V500:   | <input type="radio"/> | <input type="radio"/> | <input type="radio"/> | <input type="radio"/> | <input type="radio"/> | <input type="radio"/> | <input type="radio"/> | <input type="radio"/> |
| Dräger Savina 300:   | <input type="radio"/> | <input type="radio"/> | <input type="radio"/> | <input type="radio"/> | <input type="radio"/> | <input type="radio"/> | <input type="radio"/> | <input type="radio"/> |
| Maquet SERVO-i:      | <input type="radio"/> | <input type="radio"/> | <input type="radio"/> | <input type="radio"/> | <input type="radio"/> | <input type="radio"/> | <input type="radio"/> | <input type="radio"/> |
| Maquet SERVO-u:      | <input type="radio"/> | <input type="radio"/> | <input type="radio"/> | <input type="radio"/> | <input type="radio"/> | <input type="radio"/> | <input type="radio"/> | <input type="radio"/> |

\* 14. If you are currently using the following device(s) in your practice, how often do you use them?

|                      | No Experience         | Daily                 | Every 2-4 days        | Once a week           | Twice a week          | Once a month          | Less than once a month |
|----------------------|-----------------------|-----------------------|-----------------------|-----------------------|-----------------------|-----------------------|------------------------|
| Puritan Bennett 840: | <input type="radio"/> | <input type="radio"/> | <input type="radio"/> | <input type="radio"/> | <input type="radio"/> | <input type="radio"/> | <input type="radio"/>  |
| Puritan Bennett 980: | <input type="radio"/> | <input type="radio"/> | <input type="radio"/> | <input type="radio"/> | <input type="radio"/> | <input type="radio"/> | <input type="radio"/>  |
| Hamilton S1:         | <input type="radio"/> | <input type="radio"/> | <input type="radio"/> | <input type="radio"/> | <input type="radio"/> | <input type="radio"/> | <input type="radio"/>  |
| Hamilton G5:         | <input type="radio"/> | <input type="radio"/> | <input type="radio"/> | <input type="radio"/> | <input type="radio"/> | <input type="radio"/> | <input type="radio"/>  |
| Dräger Evita XL:     | <input type="radio"/> | <input type="radio"/> | <input type="radio"/> | <input type="radio"/> | <input type="radio"/> | <input type="radio"/> | <input type="radio"/>  |
| Dräger Evita V500:   | <input type="radio"/> | <input type="radio"/> | <input type="radio"/> | <input type="radio"/> | <input type="radio"/> | <input type="radio"/> | <input type="radio"/>  |
| Dräger Savina 300:   | <input type="radio"/> | <input type="radio"/> | <input type="radio"/> | <input type="radio"/> | <input type="radio"/> | <input type="radio"/> | <input type="radio"/>  |
| Maquet SERVO-i:      | <input type="radio"/> | <input type="radio"/> | <input type="radio"/> | <input type="radio"/> | <input type="radio"/> | <input type="radio"/> | <input type="radio"/>  |
| Maquet SERVO-u:      | <input type="radio"/> | <input type="radio"/> | <input type="radio"/> | <input type="radio"/> | <input type="radio"/> | <input type="radio"/> | <input type="radio"/>  |
