# Supplementary material for: The usability of ventilators: a comparative evaluation of use safety and user experience
Source: Springer Nature journal article supplement (doi:10.1186/s13054-016-1431-1), 2016-08-18

# Use Errors/Close Calls

Use Safety

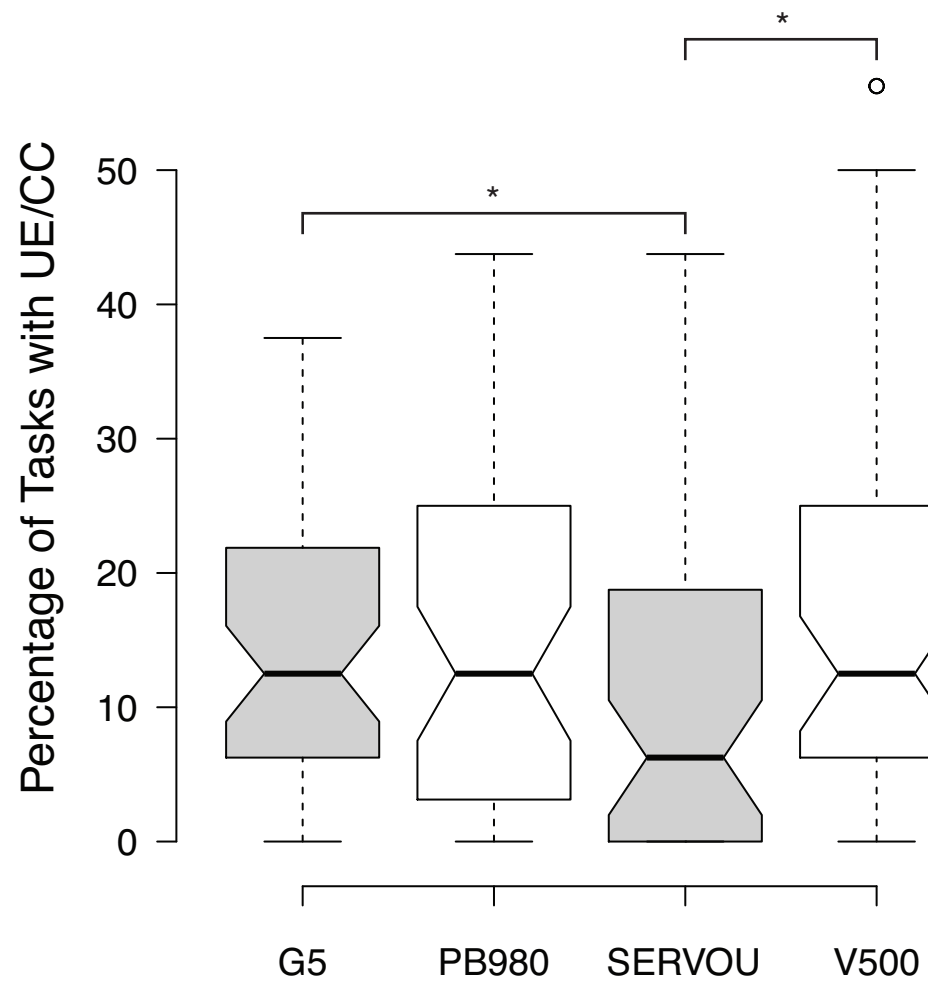

# NASA-TLX

Workload

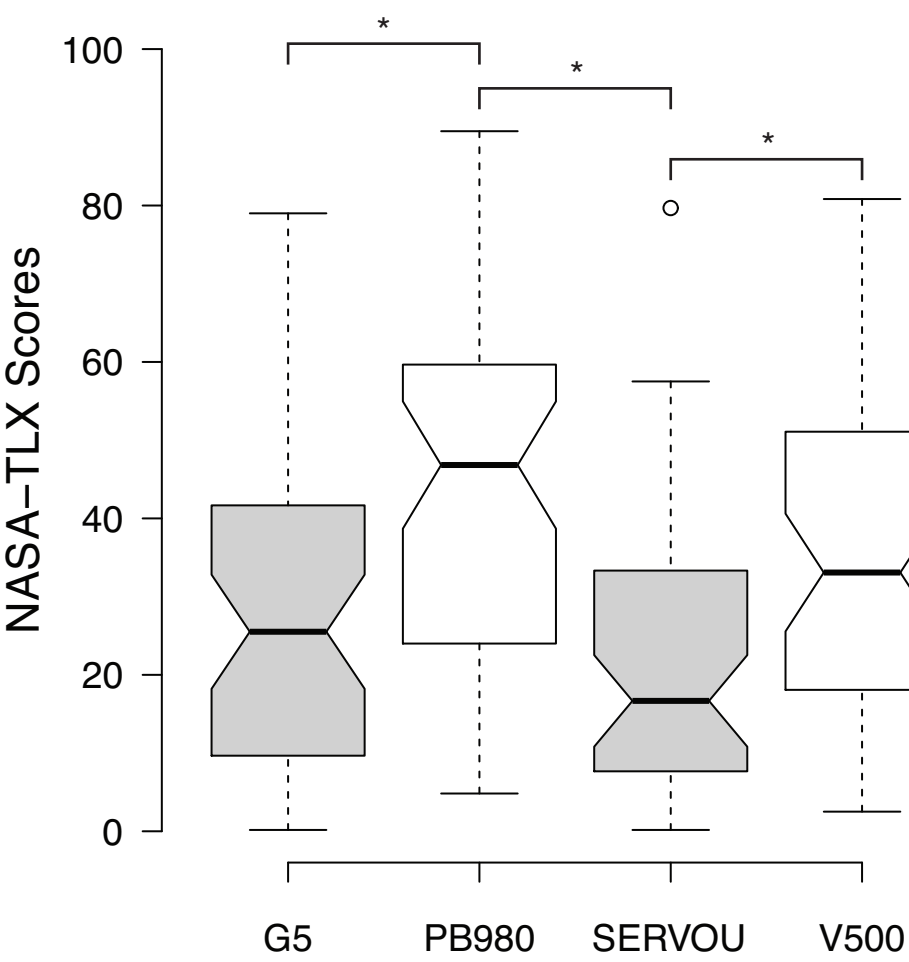

# PSSUQ

System Usability

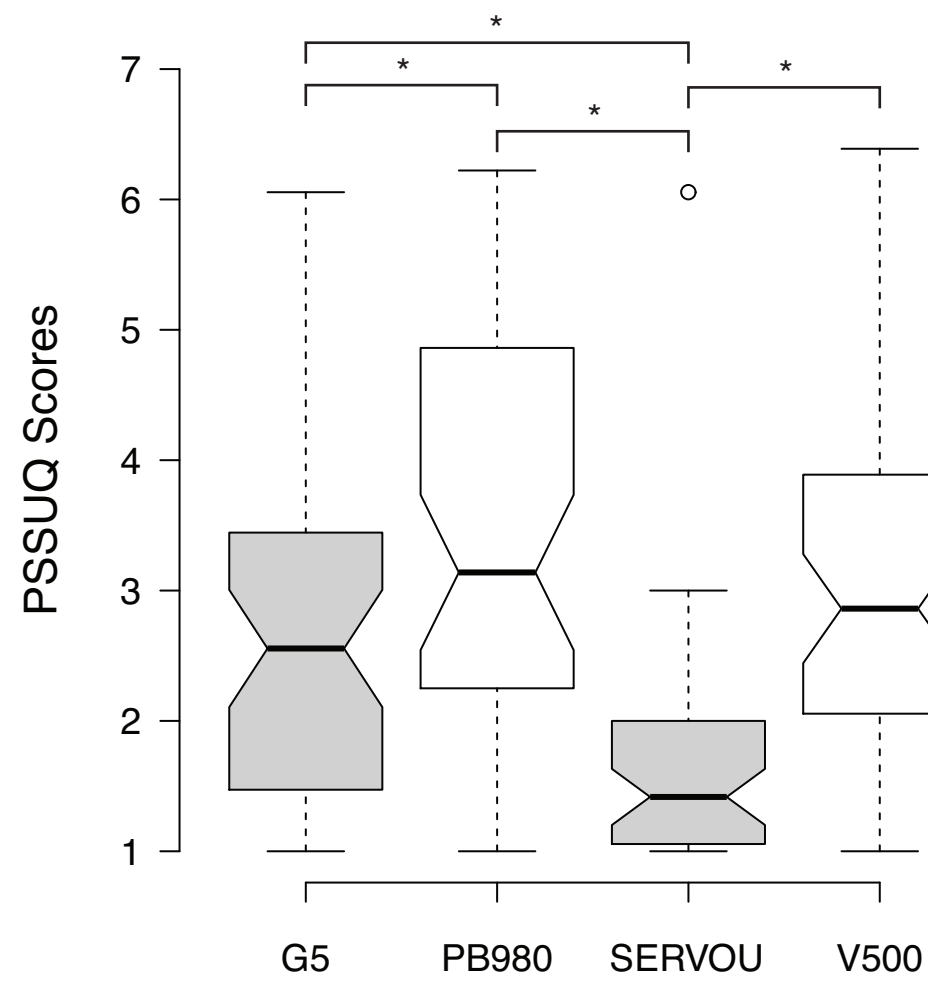

Supplement: MOESM3 [file 10602384]
